# Supplementary material for: Burden in caregivers of children with congenital Zika syndrome in Pernambuco, Brazil: analysis and application of the Zarit burden interview scale
Source: PeerJ. 2023 Feb 2;11:e14807. doi: 10.7717/peerj.14807 (PMC9899425; doi:10.7717/peerj.14807)
Supplement: Supplemental Information 5 [file peerj-11-14807-s005.xlsx]

## Sheet: Planilha1
					University Center of the Faculty of Medicine of ABC Paulista
					Graduate Program in Health Sciences
					Area of ​​Concentration: Collective Health
					Line of Research: Education and Health
					JERONIMO FAUSTINO DO REGO FILHO
					Advisor: dr. Rubens Wajnsztejn
					CO-Advisor: Dra. CLAUDIA ALVES DE SENA
			DATA OF CAREGIVERS: SOCIODEMOGRAPHIC PROFILE OF THE CAREGIVER OF CHILDREN WITH MICROCEPHALY BY THE ZIKA VIRUS
Caregiver	Gender	Degree of kinship	Age in years	Marital status	Number of living children	Number of children with microcephaly	In what gestational period “mother case” did Zika virus disease occur	Family income: In Reais (R$):	Do you have any medical treatment after taking care of the child?	Do you work?	Activities as a caregiver: DO YOU PARTICIPATE? Offer baby food?	Activities as a caregiver: DO YOU PARTICIPATE? Child medication?	Activities as a caregiver: DO YOU PARTICIPATE? Give the bath?	Activities as a caregiver: DO YOU PARTICIPATE? Dress or help dress the child?	Activities as a caregiver: DO YOU PARTICIPATE? Do you help transport the child?
01	2	2	3	1	4	1	1	1	2	2	1	1	1	1	1
02	2	3	4	1	3	0	4	1	2	2	1	1	1	1	1
03	2	2	2	2	2	1	4	1	2	2	1	1	1	1	1
04	2	2	2	2	2	1	2	1	1	2	1	1	1	1	1
05	2	2	2	2	4	1	3	1	1	2	1	1	1	1	1
06	2	2	3	2	4	1	3	1	1	2	1	1	1	1	1
07	2	2	2	2	3	1	1	1	1	2	1	1	1	1	1
08	2	2	2	2	1	1	2	1	1	2	1	1	1	1	1
09	2	2	4	1	2	1	1	1	1	2	1	1	1	1	1
10	2	2	2	2	1	1	3	1	2	2	1	1	1	1	1
11	2	2	3	2	2	1	4	1	2	2	1	1	1	1	1
12	2	2	3	2	4	1	2	1	2	2	1	1	1	1	1
13	2	2	2	2	2	1	1	1	2	2	1	1	1	1	1
14	2	2	2	2	3	1	1	1	2	2	1	1	1	1	1
15	2	2	3	1	1	1	1	1	2	2	1	1	1	1	1
16	2	2	2	2	3	1	1	1	2	2	1	1	1	1	1
17	2	2	3	1	2	1	1	1	2	2	1	1	1	1	1
18	2	2	3	1	4	1	2	1	2	2	1	2	1	1	1
19	2	2	3	1	2	1	3	1	2	2	1	1	1	1	1
20	2	2	3	3	3	1	1	1	2	2	1	1	1	1	1
21	2	2	3	1	4	1	2	2	2	2	2	2	2	2	2
22	2	2	3	2	3	1	4	1	2	2	1	1	1	1	1
23	2	2	3	1	2	1	1	1	2	2	1	1	1	1	1
24	2	2	2	2	2	1	3	1	2	2	1	1	1	1	1
25	2	2	2	2	2	1	4	1	2	2	1	1	1	1	1
26	2	2	2	2	1	1	1	1	2	2	1	1	1	1	1
27	2	2	3	2	4	1	2	1	2	2	1	1	1	1	1
28	2	2	3	2	1	1	1	1	2	2	1	1	1	1	1
29	2	2	2	2	1	1	1	1	2	2	1	1	1	1	1
30	2	2	2	2	1	1	0	1	2	2	1	1	1	1	1
31	2	3	3	1	1	1	2	1	2	2	1	1	1	1	1
32	2	2	3	1	1	1	1	1	2	2	1	1	1	1	1
33	2	2	3	2	6	1	2	1	1	2	1	1	1	2	1
34	2	2	3	1	2	1	1	1	1	1	2	2	2	2	2
35	2	2	3	1	1	1	1	1	2	2	1	1	1	1	1
36	2	2	2	1	6	1	1	1	2	2	1	1	1	1	1
37	2	2	2	2	1	1	2	1	2	2	2	2	2	2	2
38	2	3	4	1	1	1	1	1	2	2	1	1	1	1	1
39	2	2	2	1	2	1	4	1	2	2	1	1	1	1	1
40	2	2	2	2	1	1	2	1	2	2	1	1	1	1	1
41	2	2	2	2	2	1	4	1	2	2	2	2	2	2	2
42	2	2	3	1	2	1	2	1	2	2	1	1	1	1	1
43	2	2	1	2	1	1	1	1	2	2	1	1	1	1	1
44	2	2	4	2	2	1	1	1	2	2	1	1	1	1	1
45	2	2	3	1	3	1	2	1	2	2	1	1	1	1	1
46	2	2	2	2	2	1	4	1	2	2	1	1	1	1	1
47	2	2	3	1	2	1	4	1	2	2	1	1	1	1	1
48	2	2	3	1	2	1	1	1	2	2	1	1	1	1	1
49	2	3	4	2	1	1	1	1	2	2	1	1	1	1	1
50	2	2	2	1	2	1	3	1	2	2	1	1	1	1	1
51	2	2	3	2	5	1	1	1	2	2	1	1	1	1	1
52	2	2	3	2	2	1	1	1	2	2	1	1	1	1	1
53	2	2	4	1	1	1	1	1	2	2	1	1	1	1	1
54	2	2	3	2	4	1	1	1	1	2	1	1	1	1	1
55	2	2	3	1	2	1	2	1	1	2	1	1	1	1	1
56	2	2	2	2	2	1	2	1	1	2	1	1	1	1	1
57	2	2	2	2	1	1	4	1	1	2	1	1	1	1	1
58	2	2	2	2	3	1	1	1	2	2	1	1	1	1	1
59	2	2	2	1	3	1	2	1	2	2	1	1	1	1	1
60	2	2	2	2	1	1	1	1	2	2	1	1	1	1	1
Sociodemographic profile of the responsible caregiver: Responsible for home care for children with microcephaly caused by the Zika virus:
A. Gender: 1. Masculine ( ) 2. Feminine ( ) 3. Uninformed ( )
B. Degree of kinship: 1. Father ( ) 2. Mother ( ) 3.Other______________________
C. Age in years: 1. ( ) < 20 years; 2. ( ) between 21 and 30 years; 3. ( ) between 31 and 40 years; 4. ( ) > 40 years.
D. Marital status: 1. Married ( ) 2. Single ( ) 3. Divorced ( ) 4. Widower ( )
E. Number of living children: _______________________
F. Numbers of children with microcephaly: ____________________
G. In what gestational period “mother case” did Zika virus disease occur: 1. In the first quarter ( ) 2. In the second quarter ( ) 3. In the third quarter ( ) 4. Don’t know how to inform ( )
H. Family income: In Reais: _______________________________________________________
I. Do you have any medical treatment after taking care of the child. 1. Yes ( ) 2. No ( ) J. Do you work?. 1. Yes ( ) 2. No ( ) If the alternative is Yes. What is your profession? ______________________________________________________
J. Do you work?. 1. Yes ( ) 2. No ( ) If the alternative is Yes. What is your profession? ______________________________________________________
L. Activities as a caregiver: DO YOU PARTICIPATE?
_Of the child's food;
1. Yes ( ) 2. No ( )
_Child medication;
1. Yes ( ) 2. No ( )
_Bath the child;
1. Yes ( ) 2. No ( )
_Dress or help dress the child;
1. Yes ( ) 2. No ( )
_Do you help transport the child?.
1. Yes ( ) 2. No ( )
